# Supplementary material for: Postexposure Efficacy of Recombinant Vesicular Stomatitis Virus Vectors Against High and Low Doses of Marburg Virus Variant Angola in Nonhuman Primates
Source: PubMed Central journal article supplement — J Infect Dis. 2018 Jun 25;218(Suppl 5):S582–7. doi: 10.1093/infdis/jiy293 (PMC6249565; doi:10.1093/infdis/jiy293), 2018-06-25

**Untreated control  
(day 8 terminal)**

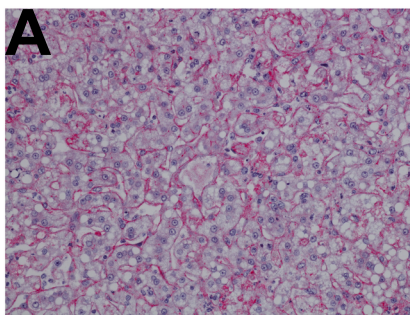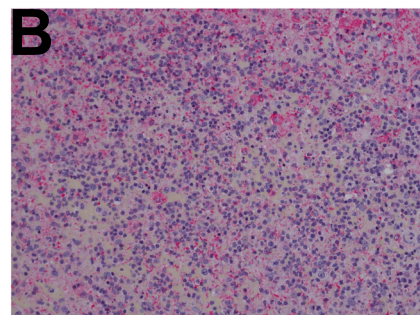

**Vector control  
(day 12 terminal)**

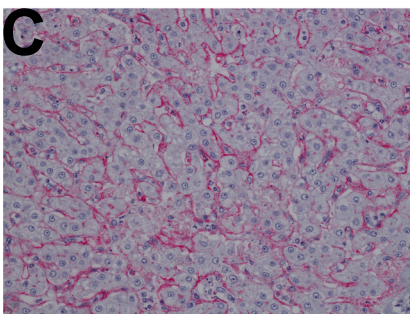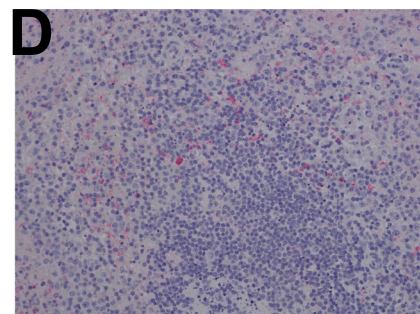

**Treated fatal  
(day 10 terminal)**

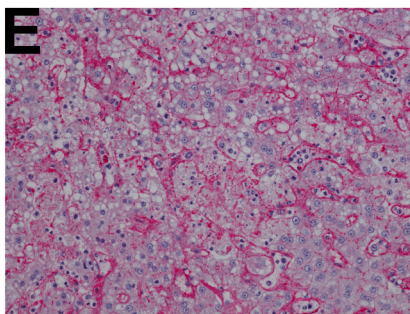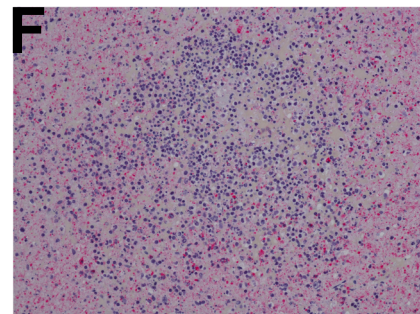

**Treated survivor  
(day 28 study endpoint)**

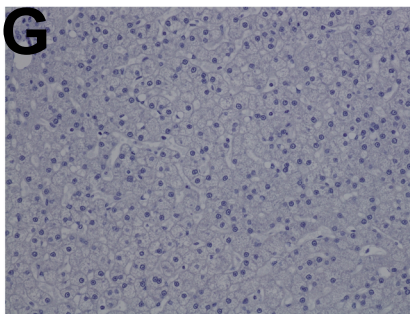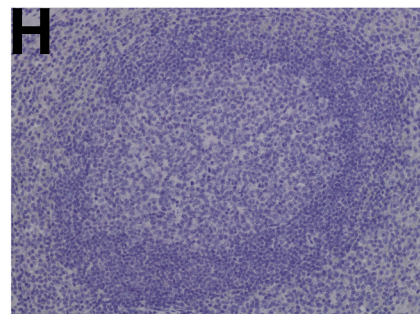

Supplement: jiy293_suppl_supplemental_figure-2.pdf [file jiy293_suppl_supplemental_figure-2.pdf]
