# Supplementary material for: Postexposure Efficacy of Recombinant Vesicular Stomatitis Virus Vectors Against High and Low Doses of Marburg Virus Variant Angola in Nonhuman Primates
Source: PubMed Central journal article supplement — J Infect Dis. 2018 Jun 25;218(Suppl 5):S582–7. doi: 10.1093/infdis/jiy293 (PMC6249565; doi:10.1093/infdis/jiy293), 2018-06-25
Supplement: jiy293_suppl_supplemental_table-1.pdf [file jiy293_suppl_supplemental_table-1.pdf]

**Supplemental Table 1. Clinical findings.** Animals were monitored daily for signs of disease. Blood was collected prior to challenge, terminally, and 3, 6, 10, 14, and 21 days post-challenge to perform hematology cell counts on whole blood and biochemistry analysis on serum.

| Animal*                | MARV Dose | Treatment**            | Clinical Signs †                                                                                                                                                                                                                                                                                                                                      | Final Disposition   |
|------------------------|-----------|------------------------|-------------------------------------------------------------------------------------------------------------------------------------------------------------------------------------------------------------------------------------------------------------------------------------------------------------------------------------------------------|---------------------|
| Control 1              | High      | None                   | Fever (6), depression (6-8), mild to moderate petechial rash (6-8), leukocytosis (8), BUN +++ (8), CRE +++ (8), ALT +++ (6,8), AST +++ (6) > (8), ALP + (6), GGT ++ (8), CRP increase (6,8)                                                                                                                                                           | Succumbed on day 8  |
| Control 2 (historical) | High      | None                   | Fever (3,6,7), depression (6-7), anorexia (6-7), mild to moderate petechial rash (7), mild dyspnea (7), leukocytosis (7), granulocytosis (7), BUN ++ (7), CRE + (7), ALT +++ (6) > (7), AST +++ (6) > (7), ALP ++ (6) +++ (7), GGT ++ (6) +++ (7), CRP increase (6,7)                                                                                 | Succumbed on day 7  |
| Control 3 (historical) | High      | None                   | Fever (4,6), depression (6-8), anorexia (7-8), mild to moderate petechial rash (7-8), leukocytosis (8), lymphopenia (3,6), CRE ++ (8), ALT +++ (6) > (8), AST +++ (6) > (8), ALP ++ (6) +++ (8), GGT ++ (8), CRP increase (6,8)                                                                                                                       | Succumbed on day 8  |
| Treated Fatal 1        | High      | rVSVΔG/MARV -Angola-GP | Fever (6,10), depression (9-11), anorexia (10-11), mild to moderate petechial rash (10), moderate to severe petechial rash (11), edema (11), leukocytosis (10,11), lymphopenia (6), granulocytosis (10,11), thrombocytopenia (10,11), BUN + (10) +++ (11), CRE + (10) +++ (11), ALT +++ (10,11), AST > (10,11), GGT + (10,11), CRP increase (6,10,11) | Succumbed on day 11 |
| Treated Fatal 2        | High      | rVSVΔG/MARV -Angola-GP | Fever (6), depression (8-9), moderate petechial rash (8-9), lymphopenia (6), AST + (6), CRP increase (6)                                                                                                                                                                                                                                              | Succumbed on day 10 |
| Treated Fatal 3        | High      | rVSVΔG/MARV -Angola-GP | Fever (6), depression (7-8), mild to moderate petechial rash (8), leukocytosis (6), granulocytosis (6), CRP increase (3,6)                                                                                                                                                                                                                            | Succumbed on day 9  |
| Treated Survivor       | High      | rVSVΔG/MARV -Angola-GP | Fever (6), mild depression (11), anorexia (13), leukocytosis (6,14,21,28), granulocytosis (3,6,14,21), thrombocytopenia (10,14), ALT +++ (10) ++ (14), AST+++ (10), ALP + (3,6, 28) ++ (10,21) +++ (14), GGT + (10,11), CRP increase (3,6,10,14)                                                                                                      | Survived to day 28  |
| Control 1              | Low       | None                   | Fever (6), depression (6-8), anorexia (7-8), lymphopenia (3,6), ALT +++ (6), AST +++ (6) > (8), ALP + (6), GGT + (6), CRP increase (3,6)                                                                                                                                                                                                              | Succumbed on day 8  |
| Control 2              | Low       | None                   | Fever (6), depression (8-9), anorexia (7-9), mild to moderate petechial rash (8-9), BUN ++ (9), CRE +                                                                                                                                                                                                                                                 | Succumbed on day 9  |

|                          |     |                                |                                                                                                                                                                                                                                                                                                                                  |                     |
|--------------------------|-----|--------------------------------|----------------------------------------------------------------------------------------------------------------------------------------------------------------------------------------------------------------------------------------------------------------------------------------------------------------------------------|---------------------|
|                          |     |                                | (9), ALT ++ (6) +++ (9), AST +++ (6,9), ALP ++ (9), GGT +++ (9), CRP increase (9)                                                                                                                                                                                                                                                |                     |
| Control 3                | Low | None                           | Fever (6), depression (10), anorexia (8,10), mild to moderate petechial rash (10), emesis (8), leukocytosis (6,10), granulocytosis (3,6), CRE + (10), ALT +++ (10), AST + (6) +++ (10), ALP +++ (10), GGT +++ (10), CRP increase (6,10)                                                                                          | Succumbed on day 10 |
| Vector Control           | Low | rVSVN4CT1-HIV gag              | Fever (10), depression (12), anorexia (10-12), mild petechial rash (10-12), BUN + (12), CRE ++ (12), ALT +++ (10,12), AST +++ (10,12), ALP ++ (10,12), GGT +++ (10,12), CRP increase (10,12)                                                                                                                                     | Succumbed on day 12 |
| $\Delta$ G Treated Fatal | Low | rVSV $\Delta$ G/MARV-Angola-GP | Fever (6), depression (10,11), anorexia (8,9,11), mild to moderate petechial rash (10), ecchymotic rash (11), leukocytosis (11), lymphopenia (6,10), granulocytosis (3,6,10,11), thrombocytopenia (10), BUN + (10) +++ (11), CRE +++ (11), ALT > (10,11), AST > (10,11), ALP ++ (10,11), GGT +++ (10,11), CRP increase (6,10,11) | Succumbed on day 11 |
| $\Delta$ G Survivor 1    | Low | rVSV $\Delta$ G/MARV-Angola-GP | Granulocytosis (21)                                                                                                                                                                                                                                                                                                              | Survived to day 28  |
| $\Delta$ G Survivor 2    | Low | rVSV $\Delta$ G/MARV-Angola-GP |                                                                                                                                                                                                                                                                                                                                  | Survived to day 28  |
| $\Delta$ G Survivor 3    | Low | rVSV $\Delta$ G/MARV-Angola-GP |                                                                                                                                                                                                                                                                                                                                  | Survived to day 28  |
| N4 Fatal 1               | Low | rVSVN4CT1-MARV-Angola GP       | Fever (6), depression (10), anorexia (9-10), mild to moderate petechial rash (10), mild dyspnea (10), leukocytosis (10), lymphopenia (6), granulocytosis (10), BUN +++ (10), CRE +++ (10), ALT +++ (10), AST ++ (10), ALP ++ (10), GGT +++ (10), CRP increase (10)                                                               | Succumbed on day 10 |
| N4 Fatal 2               | Low | rVSVN4CT1-MARV-Angola GP       | Fever (6), depression (10), anorexia (9-10), mild to moderate petechial rash (10), mild dyspnea (10), leukocytosis (10), granulocytosis (6), BUN +++ (10), CRE +++ (10), ALT +++ (10), AST ++ (10), ALP ++ (10), GGT ++ (10), CRP increase (6,10)                                                                                | Succumbed on day 10 |
| N4 Survivor 1            | Low | rVSVN4CT1-MARV-Angola GP       |                                                                                                                                                                                                                                                                                                                                  | Survived to day 28  |
| N4 Survivor 2            | Low | rVSVN4CT1-MARV-Angola GP       |                                                                                                                                                                                                                                                                                                                                  | Survived to day 28  |
| N4 Survivor 3            | Low | rVSVN4CT1-MARV-Angola GP       | Fever (6), leukocytosis (14), granulocytosis (6), ALT ++ (10), AST +++ (10)                                                                                                                                                                                                                                                      | Survived to day 28  |

\*N4, referring to individual monkey treated with rVSVN4CT1-MARV-Angola GP; ΔG, referring to individual monkey treated with rVSVΔG/MARV-Angola-GP

\*\*MARV, Marburg virus; rVSV, recombinant vesicular stomatitis virus; MARV-Angola-GP, Marburg virus Angola glycoprotein; N4, the rVSV nucleoprotein (N) is at position 4 in the genome; CT1, the native rVSV glycoprotein (G) has a truncated cytoplasmic tail; ΔG, the native VSV G is absent; HIV, human immunodeficiency virus; gag, group-specific antigen.

†Day after MARV Angola challenge is in parentheses. Fever is defined as a temperature greater than 2.5 °F above baseline or at least 1.5 °F above baseline and  $\geq 103.5$  °F, or 1.1 °F above baseline and  $\geq 104$ °F. Lymphopenia and thrombocytopenia are defined by a  $\geq 35\%$  drop in numbers of lymphocytes and platelets, respectively. Leukocytosis and granulocytosis are defined as a  $\geq$  two-fold increase in leukocytes and granulocytes, respectively. Abbreviations: BUN, blood urea nitrogen; CRE, creatinine; ALT, alanine aminotransferase; AST, aspartate aminotransferase; ALP, alkaline phosphatase; GGT, gamma-glutamyltransferase; CRP, c-reactive protein. Crosses indicate increases in liver enzymes (ALT, AST, ALP, GGT), renal function test values (BUN, CRE), and c-reactive protein: 2- to 3-fold increase, +; >3- up to 5-fold increase, ++; >5 fold increase, +++; out of range, >.
