# Supplementary material for: Postexposure Efficacy of Recombinant Vesicular Stomatitis Virus Vectors Against High and Low Doses of Marburg Virus Variant Angola in Nonhuman Primates
Source: PubMed Central journal article supplement — J Infect Dis. 2018 Jun 25;218(Suppl 5):S582–7. doi: 10.1093/infdis/jiy293 (PMC6249565; doi:10.1093/infdis/jiy293), 2018-06-25
Supplement: jiy293_suppl_supplemental_table-2.pdf [file jiy293_suppl_supplemental_table-2.pdf]

**Supplemental Table 2. Neutralizing antibody titers.** Serum was evaluated for neutralizing antibody titers prior to challenge and terminally for untreated controls. Treated macaque sera were additionally evaluated 10 and 14 days post-challenge. The reciprocal dilution titer of sera that neutralized  $\geq 50\%$  of viral plaques is reported.

| Animal*                  | MARV Dose | Treatment**                    | Day 0†    | Day 6†    | Day 10†   | Terminal or Day 28† |
|--------------------------|-----------|--------------------------------|-----------|-----------|-----------|---------------------|
| Control 1                | High      | None                           | $\leq 10$ | N.D.      | N.D.      | $\leq 10$           |
| Control 2                | High      | None                           | $\leq 10$ | N.D.      | N.D.      | $\leq 10$           |
| Control 3                | High      | None                           | $\leq 10$ | N.D.      | N.D.      | $\leq 10$           |
| Treated Fatal 1          | High      | rVSV $\Delta$ G/MARV-Angola-GP | $\leq 10$ | $\leq 10$ | $\leq 10$ | $\leq 10$           |
| Treated Fatal 2          | High      | rVSV $\Delta$ G/MARV-Angola-GP | $\leq 10$ | $\leq 10$ | $\leq 10$ | $\leq 10$           |
| Treated Fatal 3          | High      | rVSV $\Delta$ G/MARV-Angola-GP | $\leq 10$ | $\leq 10$ | $\leq 10$ | $\leq 10$           |
| Treated Survivor         | High      | rVSV $\Delta$ G/MARV-Angola-GP | $\leq 10$ | $\leq 10$ | <b>20</b> | <b>20</b>           |
| Control 1                | Low       | None                           | $\leq 10$ | N.D.      | N.D.      | $\leq 10$           |
| Control 2                | Low       | None                           | $\leq 10$ | N.D.      | N.D.      | $\leq 10$           |
| Control 3                | Low       | None                           | $\leq 10$ | N.D.      | $\leq 10$ | $\leq 10$           |
| Vector Control           | Low       | rVSVN4CT1-HIV gag              | $\leq 10$ | N.D.      | N.D.      | $\leq 10$           |
| $\Delta$ G Treated Fatal | Low       | rVSV $\Delta$ G/MARV-Angola-GP | $\leq 10$ | $\leq 10$ | $\leq 10$ | $\leq 10$           |
| $\Delta$ G Survivor 1    | Low       | rVSV $\Delta$ G/MARV-Angola-GP | $\leq 10$ | $\leq 10$ | $\leq 10$ | <b>40</b>           |
| $\Delta$ G Survivor 2    | Low       | rVSV $\Delta$ G/MARV-Angola-GP | $\leq 10$ | $\leq 10$ | $\leq 10$ | <b>40</b>           |
| $\Delta$ G Survivor 3    | Low       | rVSV $\Delta$ G/MARV-Angola-GP | $\leq 10$ | $\leq 10$ | <b>20</b> | <b>20</b>           |
| N4 Fatal 1               | Low       | rVSVN4CT1-MARV-Angola GP       | $\leq 10$ | $\leq 10$ | $\leq 10$ | $\leq 10$           |
| N4 Fatal 2               | Low       | rVSVN4CT1-MARV-Angola GP       | $\leq 10$ | $\leq 10$ | $\leq 10$ | $\leq 10$           |
| N4 Survivor 1            | Low       | rVSVN4CT1-MARV-Angola GP       | $\leq 10$ | $\leq 10$ | $\leq 10$ | <b>40</b>           |

|               |     |                          |      |      |           |           |
|---------------|-----|--------------------------|------|------|-----------|-----------|
| N4 Survivor 2 | Low | rVSVN4CT1-MARV-Angola GP | ≤ 10 | ≤ 10 | <b>20</b> | <b>80</b> |
| N4 Survivor 3 | Low | rVSVN4CT1-MARV-Angola GP | ≤ 10 | ≤ 10 | <b>20</b> | <b>40</b> |

\*N4, referring to individual monkey treated with rVSVN4CT1-MARV-Angola GP; ΔG, referring to individual monkey treated with rVSVΔG/MARV-Angola-GP.

\*\*MARV, Marburg virus; rVSV, recombinant vesicular stomatitis virus; MARV-Angola-GP, Marburg virus Angola glycoprotein; N4, the rVSV nucleoprotein (N) is at position 4 in the genome; CT1, the native rVSV glycoprotein (G) has a truncated cytoplasmic tail; ΔG, the native VSV G is absent; HIV, human immunodeficiency virus; gag, group-specific antigen.

†N.D, not determined.
