# Supplementary figures and images for: Postexposure Efficacy of Recombinant Vesicular Stomatitis Virus Vectors Against High and Low Doses of Marburg Virus Variant Angola in Nonhuman Primates
Source: PubMed Central journal article supplement — J Infect Dis. 2018 Jun 25;218(Suppl 5):S582–7. doi: 10.1093/infdis/jiy293 (PMC6249565; doi:10.1093/infdis/jiy293), 2018-06-25

VSV

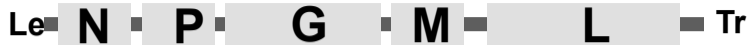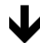

rVSV $\Delta$ G/MARV-Angola-GP

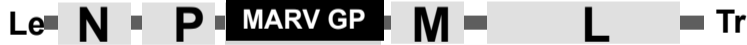

1

2

3

4

5

6

rVSVN4CT1-HIV gag

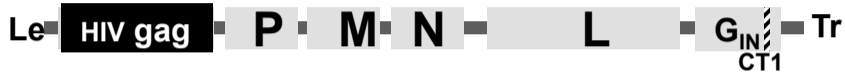

rVSVN4CT1-MARV-Angola-GP

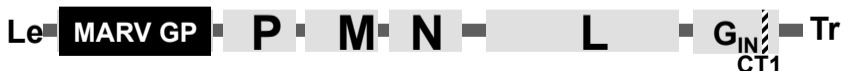

Supplement: jiy293_suppl_supplemental_figure-1.pdf [file jiy293_suppl_supplemental_figure-1.pdf]
